# Supplementary material for: Facile synthesis and enhanced electrochemical properties of reduced graphene oxide/MoS2/polyaniline ternary composites
Source: Royal Society of Chemistry journal article supplement (doi:10.1039/c7dt01170a), 2017-01-01
Supplement: c7dt01170a1.pdf [file c7dt01170a1.pdf]

## Supporting information

### Facile synthesis and enhanced electrochemical properties of reduced graphene oxide/MoS<sub>2</sub>/ polyaniline ternary composite

Ling Yu, Qianqian Wang, Hui Yang, Qilong Zhang\*, Zhongkuan Luo

School of Materials Science and Engineering, State Key Lab Silicon Mat, Zhejiang University, Hangzhou 310027, PR China

\* Corresponding author. Email: mse237@zju.edu.cn

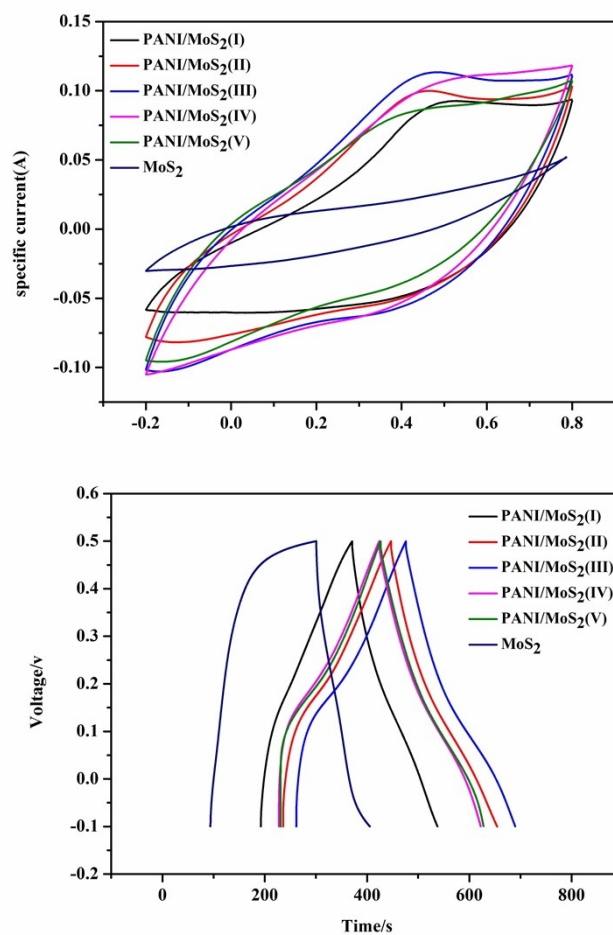

**Figure S1.** (a) CV curves of MoS<sub>2</sub>/ PANI composites tested in 1 M H<sub>2</sub>SO<sub>4</sub> electrolyte at a scan rate of 100 mV s<sup>-1</sup> (b) Charge-discharge curves of MoS<sub>2</sub>/ PANI composites at a current density of 1 A g<sup>-1</sup>.

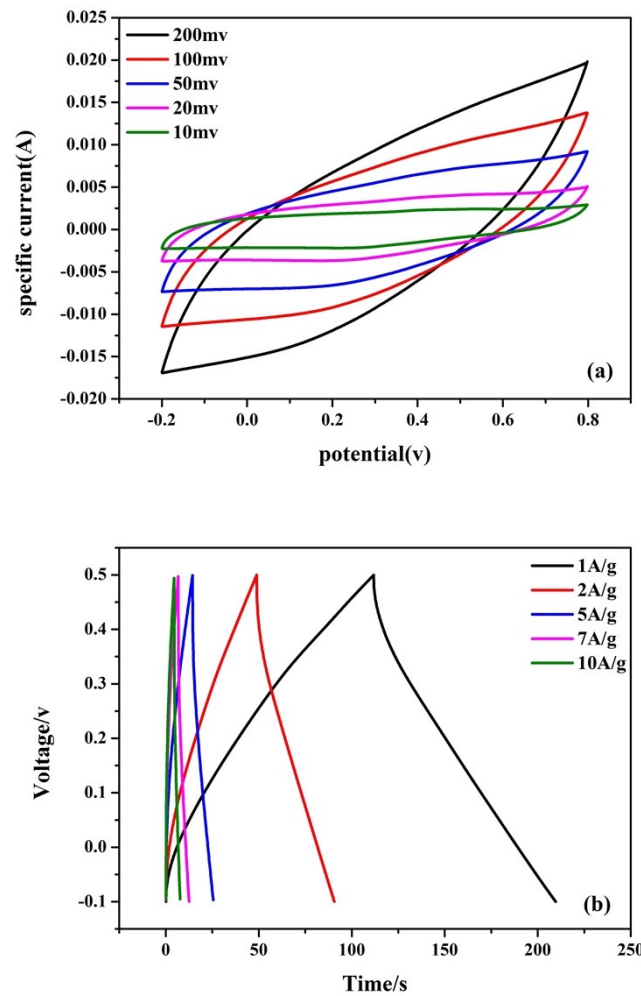

**Figure S2.** (a) CV curves of the symmetric cell of rGEO/ MoS<sub>2</sub>/ PANI(III) composite at scan rates of 10,20,50,100 and 200 mV s<sup>-1</sup>. (b) Charge–discharge curves Of the symmetric cell of rGEO/ MoS<sub>2</sub>/ PANI(III) composite at current densities of 1, 2, 5, 7 and 10 A g<sup>-1</sup>.
